# Supplementary material for: FAIL Is Not a Four-Letter Word: A Theoretical Framework for Exploring Undergraduate Students’ Approaches to Academic Challenge and Responses to Failure in STEM Learning Environments
Source: PubMed Central journal article supplement — CBE Life Sci Educ. 2019 Spring;18(1):ar11. doi: 10.1187/cbe.18-06-0108 (PMC6757216; doi:10.1187/cbe.18-06-0108), 2019
Supplement: cbe-18-ar11-s001.pdf [file cbe-18-ar11-s001.pdf]

# Supplemental Material

*CBE—Life Sciences Education*

Henry *et al.*

## Supplement A – Empirical support for modeled relationships

This supplement contains each mini-model presented in the paper (Figures 1-4) with numeric annotations corresponding to supporting references. A majority of the work referenced or below is outside of undergraduate STEM contexts. Therefore, we continue to view the connections present in each mini-model as *predictions* of relationships that might occur in *undergraduate STEM contexts*, despite the fact that many of the connections are well supported in other contexts, such as K-12 learning.

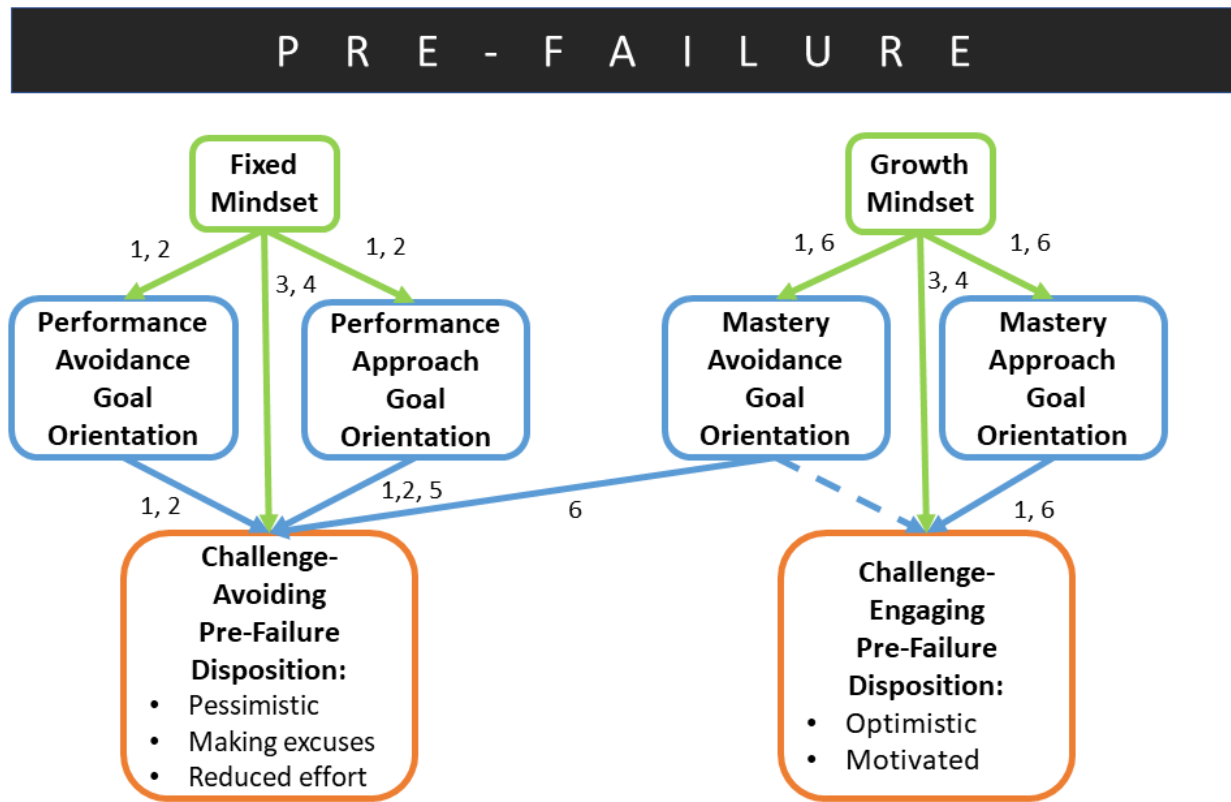

### Supplemental Figure 1

**Mini-Model 1- Mindset and Goal Orientations:** Predicted relationships between mindset (green), goal-orientation (blue), and pre-failure disposition (orange) for undergraduate STEM contexts. Growth mindset leads to a challenge-engaging pre-failure disposition; fixed mindset, by contrast, leads to a challenge-avoiding pre-failure disposition. Growth mindset leads to mastery goal orientations, while fixed mindset leads to performance goal orientations. Performance goals lead to a challenge-avoiding disposition. Mastery approach goals lead to a challenge-engaging disposition and mastery avoidance goals tend to lead to challenge-avoiding dispositions. We predict, however, that some individuals with mastery avoidance goals may express a challenge-engaging disposition though we did not find empirical support for this connection (dashed line). Where relationships are described in the literature outside of undergraduate STEM contexts (solid lines), representative publications are presented numerically.

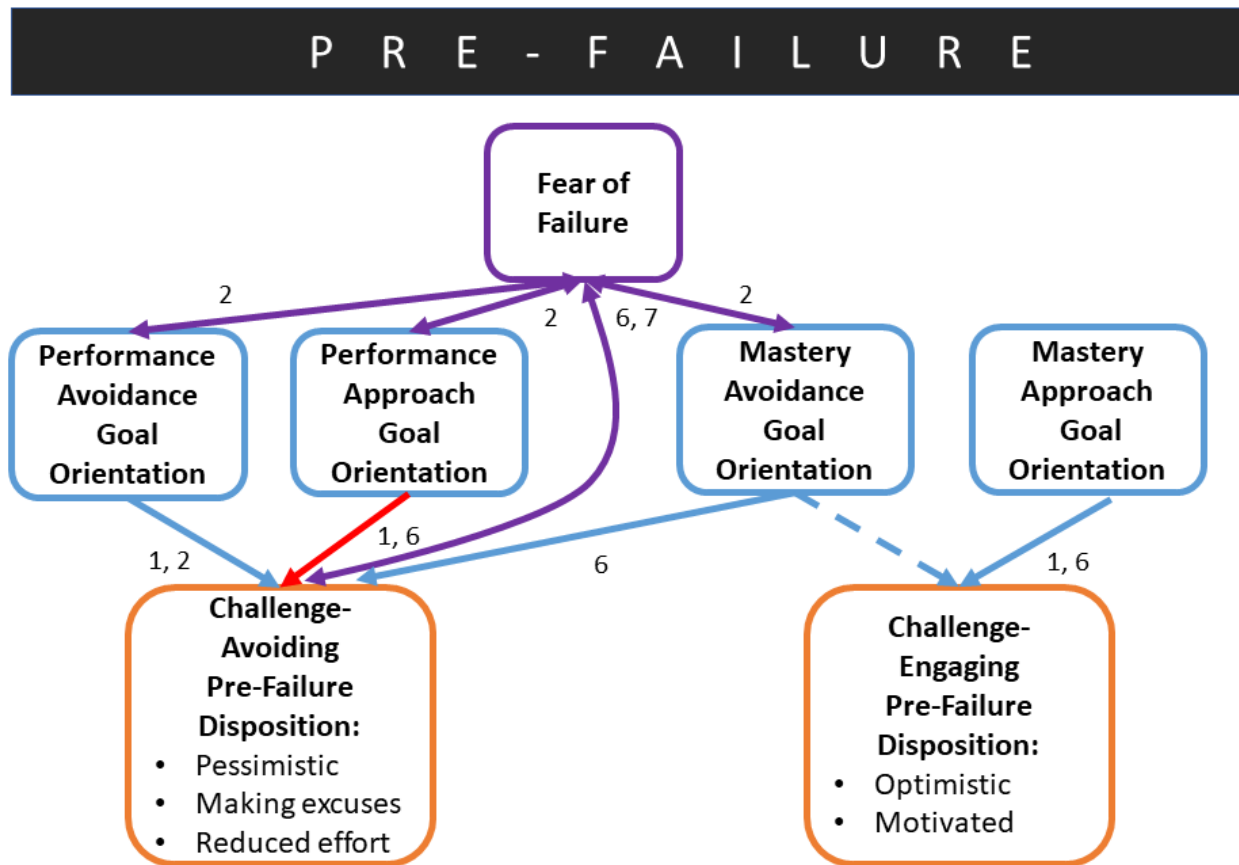

### Supplemental Figure 2

**Mini-Model 2 - FF and Goal Orientations:** Predicted relationships between fear of failure (purple), goal orientation (blue) and pre-failure disposition (orange) for undergraduate STEM contexts. Reciprocal relationships exist between FF and challenge-avoiding pre-failure dispositions and also between FF and three of the four goal orientations: mastery avoidance, performance approach, and performance avoidance. Goal orientations may directly influence the different pre-failure dispositions. Note that performance approach goal orientations are hypothesized to be related to *lower levels* of challenge-avoiding behaviors like making excuses and reduced efforts when combined with higher FF (red line), which is different than predictions in mini-model 1 in the absence of FF. Where relationships are described in the literature outside of undergraduate STEM contexts (solid lines), representative publications are presented numerically.

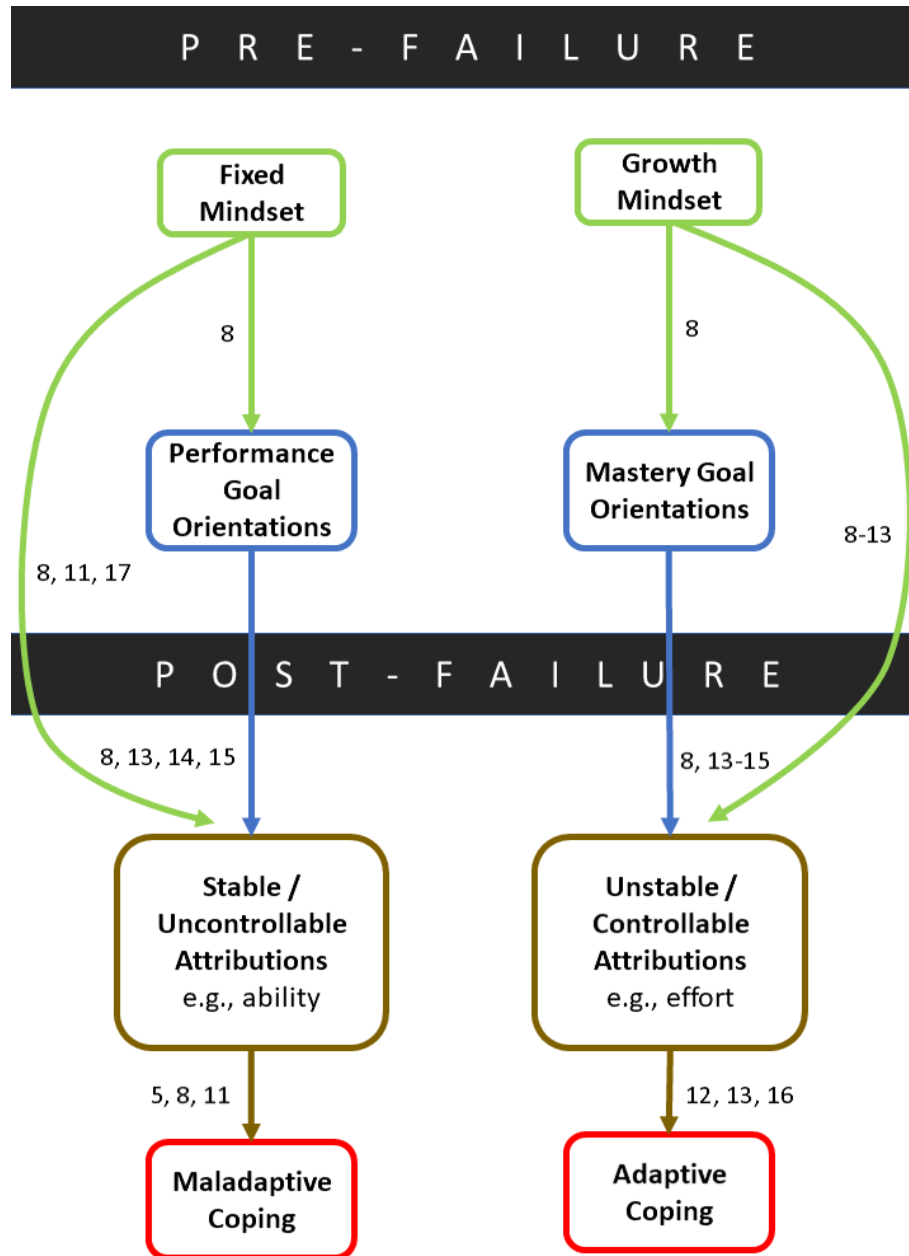

**Supplemental Figure 3**  
**Mini-Model 3. Attribution**  
**Attribution**

Predicted relationships between mindsets (green), goal orientations (blue), attribution style (brown), and coping style (red) for undergraduate STEM contexts. Those with a growth mindset and a mastery orientation style are more likely to attribute the cause of a failure to something within their control to change. This, in turn, is related to more adaptive coping behaviors. By contrast, those with fixed mindsets and performance goal orientations are likely to judge failures as resulting from something beyond their control, which is related to maladaptive coping. Where relationships have previously been described in the literature outside of undergraduate STEM contexts (solid lines), representative publications are presented numerically.

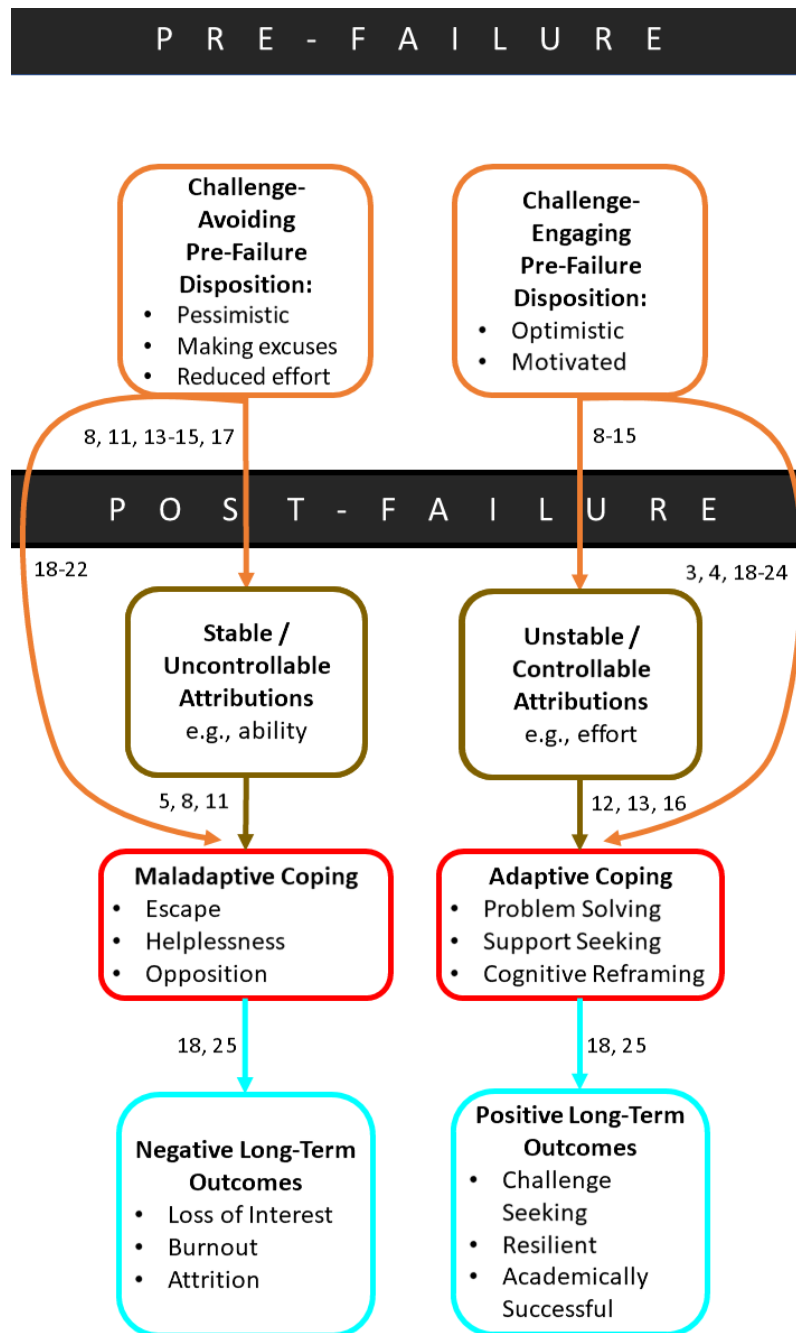

#### Supplemental Figure 4

**Mini-Model 4 - Pre-failure dispositions, Coping, and Long Term Outcomes:** Predicted relationships between pre-failure dispositions (orange), attributions (brown), coping responses (red), and long term outcomes (turquoise) for undergraduate STEM contexts. Individuals with challenge-engaging dispositions are likely to attribute failure to unstable and controllable causes and engage in adaptive coping. These students are likely to experience academic success. Individuals with challenge-avoiding dispositions are likely to attribute failure to stable and uncontrollable causes and engage in maladaptive coping. This likely leads to loss of interest in the STEM discipline, burnout, and often attrition. Where relationships are described in the literature outside of undergraduate STEM contexts (solid lines), representative publications are presented numerically.

### Mini-model References

1. Elliot, A. J. & McGregor, H. A. (2001). A 2X2 achievement goal framework. *Journal of Personality and Social Psychology*, 80(3), 501-519.
2. Moller, A. C., & Elliot, A. J. (2006). The 2 × 2 achievement goal framework: An overview of empirical research. In A. V. Mittel (Ed.), *Focus on educational psychology* (pp. 307-326). Hauppauge, NY: Nova Science Publishers.
3. Dweck, C. S. (2000). *Self-theories: Their role in motivation, personality, and development*. New York, NY: Routledge.
4. Forsythe, A. & Johnson, S. (2017). Thanks, but no-thanks for the feedback. *Assessment and Evaluation in Higher Education*, 42(6), 850-859.
5. Elliot, E. S. and Dweck, C. S. (1988). Goals: An approach to motivation and achievement. *Journal of Personality and Social Psychology*, 54(1), 5-12.
6. Chen, L. H., Wu, C. H., Kee, Y. H., Lin, M. S., & Shui, S. H. (2009). Fear of failure, 2 X 2 achievement goal and self-handicapping: An examination of the hierarchical model of achievement motivation in physical education. *Contemporary Educational Psychology*, 34, 298-305.
7. del Mar Ferradás, M., Freire, C., Valle, A., Núñez, J. C., Regueiro, B., & Vallejo, G. (2016). The relationship between self-esteem and self-worth protection strategies in university students. *Personality and Individual Differences*, 88, 236-241.
8. Robins, R. W., & Pals, J. L. (2002). Implicit self-theories in the academic domain: Implications for goal orientation, attributions, affect, and self-esteem change. *Self and identity*, 1(4), 313-336.
9. Baird, G., & Harlow, L. (2012). Implicit theories of intelligence motivation model of achievement. Poster presented at the annual meeting of the Association for Psychological Science, Boston, MA.
10. Blackwell, L. S., Trzesniewski, K. H., & Dweck, C. S. (2007). Implicit theories of intelligence predict achievement across an adolescent transition: A longitudinal study and intervention. *Child Development*, 78(1), 246-263.
11. Dweck, C. S. & Leggett, E. L. (1988). A social-cognitive approach to motivation and personality. *Psychological Review*, 95(2), 256-273.
12. Hong, Y. Y., Chiu, C. Y., Dweck, C. S., Lin, D. M. S., & Wan, W. (1999). Implicit theories, attributions, and coping: A meaning system approach. *Journal of Personality and Social psychology*, 77(3), 588.
13. Smiley, P. A., Buttitta, K. V., Chung, S. Y., Dubon, V. X., & Chang, L. K. (2016). Mediation models of implicit theories and achievement goals predict planning and withdrawal after failure. *Motivation and Emotion*, 40(6), 878-894.
14. Ames, C. & Archer, J. (1988). Achievement goals in the classroom: Students' learning strategies and motivation processes. *Journal of Educational Psychology*, 80(3), 260-267.
15. Grant, H., & Dweck, C. S. (2003). Clarifying achievement goals and their impact. *Journal of Personality and Social Psychology*, 85(3), 541-553.
16. Clifford, M. M., Kim, A., & McDonald, B. A. (1988). Responses to failure as influenced by task attribution, outcome attribution, and failure tolerance. *The Journal of Experimental Education*, 57(1), 17-37

17. Mueller, C. M., & Dweck, C. S. (1998). Praise for intelligence can undermine children's motivation and performance. *Journal of personality and social psychology*, 75(1), 33.
18. Brdar, I., Rijavec, M., & Loncaric, D. (2006). Goal orientations, coping with school failure and school achievement. *European Journal of Psychology of Education*, 21(1), 53-70.
19. Heine, S. J., Kitayama, S., Lehman, D. R., Takata, T., Ide, E., Leung, C., & Matsumoto, H. (2001). Divergent consequences of success and failure in Japan and North America: An investigation of self-improving motivations and malleable selves. *Journal of Personality and Social Psychology*, 81(4), 599-615.
20. Lou, N. M. & Noels, K. A. (2017). Measuring language mindsets and modeling their relations with goal orientations and emotional and behavioral responses in fear situations. *The Modern Language Journal*, 101(1), 214-243.
21. Mortenson, S. T. (2006). Cultural differences and similarities in seeking social support as a response to academic failure: A comparison of American and Chinese college students. *Communication Education*, 55(2), 127-146.
22. Snyder, K. E., Malin, J. L, Dent, A. L, & Linnenbrink-Garcia, L. (2014). The message matters: The role of implicit beliefs about giftedness and failure experiences in academic self-handicapping. *Journal of Educational Psychology*, 106(1), 230-241.
23. Dweck, C.S. (2007). The perils and promises of praise. *Educational Leadership*, 65(2), 34-39.
24. Ehrlinger, J., Mitchum, A. L., & Dweck, C. S. (2016). Understanding overconfidence: Theories of intelligence, preferential attention, and distorted self-assessment. *Journal of Experimental Social Psychology*, 63, 94-100.
25. Skinner, E. A., Edge, K., Altman, J., & Sherwood, H. (2003). Searching for the structure of coping: A review and critique of category systems for classifying ways of coping. *Psychological Bulletin*, 129(2), 216-269.
